# Supplementary material for: Higher chances of survival to hospital admission after out-of-hospital cardiac arrest in patients with previously diagnosed heart disease
Source: PubMed Central journal article supplement (PMC8693164; doi:10.1136/openhrt-2021-001805), 2021-12-21
Supplement: openhrt-2021-001805supp001.pdf [file openhrt-2021-001805supp001.pdf]

**Supplemental Table 1.** Multivariate logistic regression analyses of the association between having previously diagnosed heart disease and survival to hospital admission and discharge stratified by initial rhythm.

|                                                   | <b>Survival to hospital admission</b> |               |                   |               |
|---------------------------------------------------|---------------------------------------|---------------|-------------------|---------------|
|                                                   | SIR                                   |               | Non-SIR           |               |
|                                                   | n=1680                                |               | n=1791            |               |
|                                                   | Survived                              | Died          | Survived          | Died          |
| Without previously diagnosed heart disease, n (%) | 550<br>(65.6)                         | 288<br>(34.4) | 111<br>(11.6)     | 849<br>(88.4) |
| With previously diagnosed heart disease, n (%)    | 550<br>(65.3)                         | 292<br>(34.7) | 149<br>(17.9)     | 682<br>(82.1) |
| P-value                                           | 0.89                                  |               | <0.001            |               |
| Models, OR (95% CI)                               |                                       |               |                   |               |
| Crude                                             | 0.99 (0.81-1.21)                      |               | 1.67 (1.28-2.18)  |               |
| Model 1                                           | 1.12 (0.90-1.38)                      |               | 1.75 (1.33-2.31)  |               |
| Model 2                                           | 1.12 (0.90-1.39)                      |               | 1.76 (1.34-2.32)  |               |
|                                                   | <b>Survival to hospital discharge</b> |               |                   |               |
|                                                   | SIR                                   |               | Non-SIR           |               |
|                                                   | n=1680                                |               | n=1791            |               |
|                                                   | Survived                              | Died          | Survived          | Died          |
| Without previously diagnosed heart disease, n (%) | 394<br>(47.0)                         | 444<br>(53.0) | 8<br>(0.8)        | 952<br>(99.2) |
| With previously diagnosed heart disease, n (%)    | 352<br>(41.8)                         | 490<br>(58.2) | 24<br>(2.9)       | 807<br>(97.1) |
| P-value                                           | 0.032                                 |               | 0.001             |               |
| Odds ratio (95% CI)                               |                                       |               |                   |               |
| Crude                                             | 0.81 (0.67-0.98)                      |               | 3.54 (1.58-7.92)  |               |
| Model 1                                           | 1.08 (0.88-1.33)                      |               | 4.93 (2.13-11.37) |               |
| Model 2                                           | 1.08 (0.87-1.34)                      |               | 4.51 (1.95-10.40) |               |

Model 1 adjusted for age and sex. Model 2 adjusted for model 1 plus resuscitation parameters (use of automated external defibrillator, presence of bystander or ambulance witness, provision of bystander cardiopulmonary resuscitation, OHCA location, and time to defibrillator connection).

CI=confidence interval. OHCA=out-of-hospital cardiac arrest. OR=odds ratio. SIR=shockable initial rhythm.

**Supplemental Table 2.** Baseline characteristics of 1329 patients surviving to hospital diagnosis.

|                                                         | Without<br>previously<br>diagnosed heart<br>disease<br>n=674 | With<br>previously<br>diagnosed<br>heart disease<br>n=655 | P-value |
|---------------------------------------------------------|--------------------------------------------------------------|-----------------------------------------------------------|---------|
| Age in years, mean $\pm$ SD                             | 61.3 $\pm$ 12.7                                              | 68.0 $\pm$ 12.7                                           | <0.001  |
| Male sex                                                | 527 (78.2)                                                   | 508 (77.6)                                                | 0.78    |
| Cardiovascular disease risk profile                     |                                                              |                                                           |         |
| Obesity                                                 | 95 (14.1)                                                    | 128 (19.5)                                                | 0.008   |
| Hypertension                                            | 268 (39.8)                                                   | 360 (55.0)                                                | <0.001  |
| Hypercholesterolemia                                    | 180 (26.7)                                                   | 280 (42.7)                                                | <0.001  |
| Stroke/transient ischemic attack                        | 33 (4.9)                                                     | 82 (12.5)                                                 | <0.001  |
| Type 2 diabetes                                         | 89 (13.2)                                                    | 152 (23.2)                                                | <0.001  |
| Non-cardiac comorbidities                               |                                                              |                                                           |         |
| Depression                                              | 43 (6.4)                                                     | 75 (11.5)                                                 | 0.001   |
| Chronic obstructive pulmonary disease                   | 85 (12.6)                                                    | 105 (16.0)                                                | 0.075   |
| Cancer                                                  | 76 (11.3)                                                    | 107 (16.3)                                                | 0.007   |
| Rheumatic disease                                       | 24 (3.6)                                                     | 34 (5.2)                                                  | 0.15    |
| Renal dysfunction                                       | 33 (4.9)                                                     | 108 (16.5)                                                | <0.001  |
| Liver dysfunction                                       | 25 (3.7)                                                     | 27 (4.1)                                                  | 0.70    |
| Resuscitation parameters                                |                                                              |                                                           |         |
| Witnessed arrest                                        |                                                              |                                                           | 0.02    |
| By bystander                                            | 516 (76.6)                                                   | 542 (82.7)                                                |         |
| By ambulance                                            | 77 (11.4)                                                    | 54 (8.2)                                                  |         |
| Bystander CPR provided                                  | 512 (76.0)                                                   | 513 (78.3)                                                | 0.31    |
| OHCA at home location                                   | 370 (54.9)                                                   | 380 (58.0)                                                | 0.25    |
| AED connected                                           | 389 (57.7)                                                   | 369 (56.3)                                                | 0.61    |
| Shockable initial rhythm present                        | 538 (79.8)                                                   | 521 (79.5)                                                | 0.90    |
| Time to defibrillator connection*, min,<br>median (IQR) | 7.8 (5.5-10.5)                                               | 7.8 (5.9-10.3)                                            | 0.25    |

Results are presented as n (%) unless indicated otherwise.

AED=automated external defibrillator. CPR=cardiopulmonary resuscitation. IQR=interquartile range. OHCA=out-of-hospital cardiac arrest. SD=standard deviation.

\* Time between emergency call and connection of an AED or manual defibrillator.
